# Supplementary material for: A rapid fluorescence detecting platform: applicable to sense carnitine and chloramphenicol in food samples
Source: Royal Society of Chemistry journal article supplement (doi:10.1039/c4ra11449c), 2014-01-01
Supplement: c4ra11449c1.pdf [file c4ra11449c1.pdf]

## Supplementary Material

### **A rapid fluorescence detecting platform: applicable to sense carnitine and chloramphenicol in food samples**

**Ming-Hui Wang<sup>1</sup>, Jiun-An Gu<sup>1</sup>, Veerappan Mani<sup>1</sup>, Yung-Chao Wu<sup>2</sup>, Yu-Jen Lin<sup>1</sup>, Yu-Ming Chia<sup>1</sup>, Sheng-Tung Huang<sup>1,2\*</sup>**

<sup>1</sup>Institute of Chemical Engineering, National Taipei University of Technology, Taipei 10608, Taiwan (R.O.C.)

<sup>2</sup>Institute of Biochemical and Biomedical Engineering, National Taipei University of Technology, Taipei 10608, Taiwan (R.O.C.)

\*Corresponding author. Tel.: +886 2771-2171 2525, \*E-mail: [ws75624@ntut.edu.tw](mailto:ws75624@ntut.edu.tw)

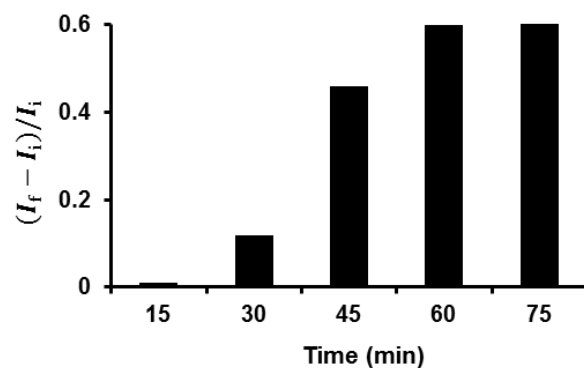

**Fig. S1** Optimization of incubation time:  $(I_f - I_i)/I_i$  vs. time (s). The experiments were carried out in 10% [v/v] DMSO in phosphate buffer (pH 7.8) containing 5  $\mu$ M BCC and 5  $\mu$ M CoA.

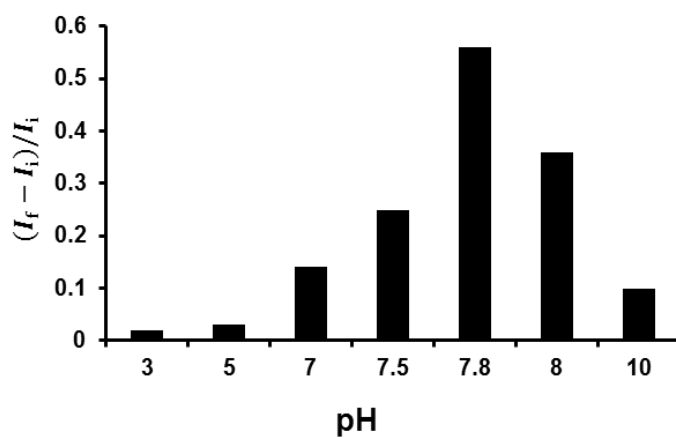

**Fig. S2.** pH Optimization plot:  $(I_f - I_i)/I_i$  versus pH. The experiments were carried out in 10% [v/v] DMSO in phosphate buffer containing 5  $\mu$ M BCC and 5  $\mu$ M CoA.

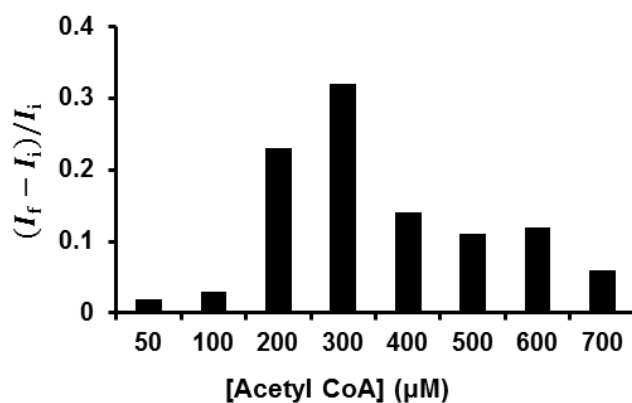

**Fig. S3.** Concentration of acetyl CoA optimization plot:  $(I_f - I_i)/I_i$  vs. [acetyl CoA] ( $\mu\text{M}$ ). The experiments were carried out in 10% [v/v] DMSO, phosphate buffer solution (pH 7.8) containing 5  $\mu\text{M}$  BCC, enzyme (0.1 unit of CrAT or 1 unit of CAT) and 5  $\mu\text{M}$  of substrate (carnitine or chloramphenicol).

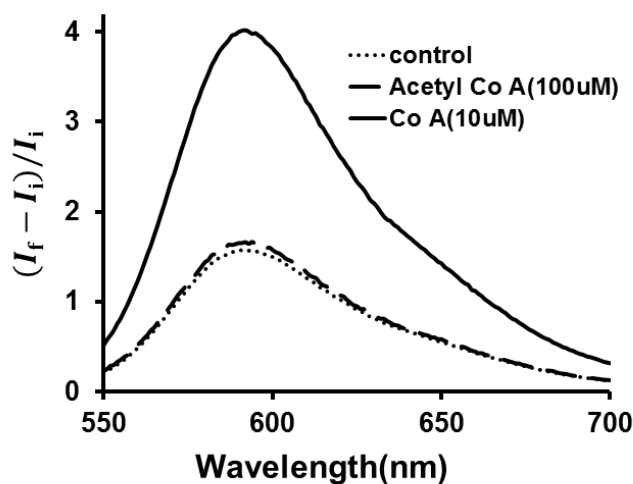

**Fig. S4.** Fluorescence spectra changes ( $\lambda_{\text{ex}} = 500 \text{ nm}$ ,  $\lambda_{\text{em}} = 595 \text{ nm}$ ) of BCC (5  $\mu\text{M}$ ) with CoA (10  $\mu\text{M}$ ), acetyl Co A and control sample. The experiments were carried out in 10% DMSO PBS (pH 7.8) (v/v).

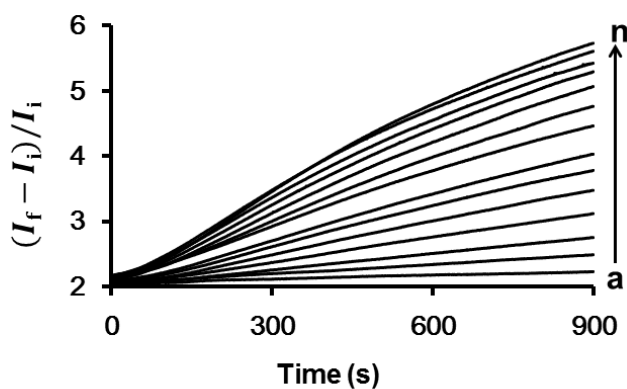

**Fig. S5.** Kinetic plots for carnitine:  $(I_f - I_i)/I_i$  vs. time (0 – 600  $\mu\text{M}$ ; a=0, b=10, c=20, d=40, e= 60, f=80, g= 100, h=150, i= 200, j= 250, k= 300, l= 400, m= 500, n= 600  $\mu\text{M}$ ). The experiments were carried out in 10% DMSO PBS (pH 7.8) (v/v) containing 300  $\mu\text{M}$  of acetyl CoA and 1 unit of CAT.

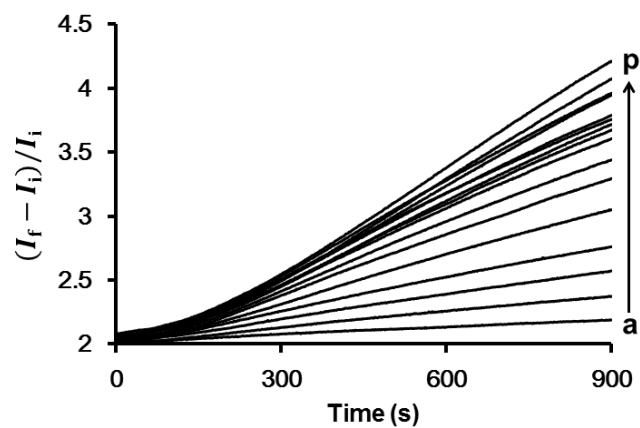

**Fig. S6.** Kinetic plots for chloramphenicol:  $(I_f - I_i)/I_i$  vs. time (0 – 100  $\mu\text{M}$ ; a= 0, b= 5, c= 10, d= 20, e= 30, f= 35, g= 40, h= 45, i= 50, j= 55, k= 60, l= 65, m= 70, n= 80, o= 90, p= 100  $\mu\text{M}$ ). The experiments were carried out in 10% DMSO PBS (pH 7.8) (v/v) containing 300  $\mu\text{M}$  of acetyl CoA and 0.1 unit of CrAT.
